# Supplementary material
Source: PubMed Central journal article supplement (PMC3356828)
Supplement: cc1009_1385SD1.pdf [file cc1009_1385SD1.pdf]

# Histogram of SIs

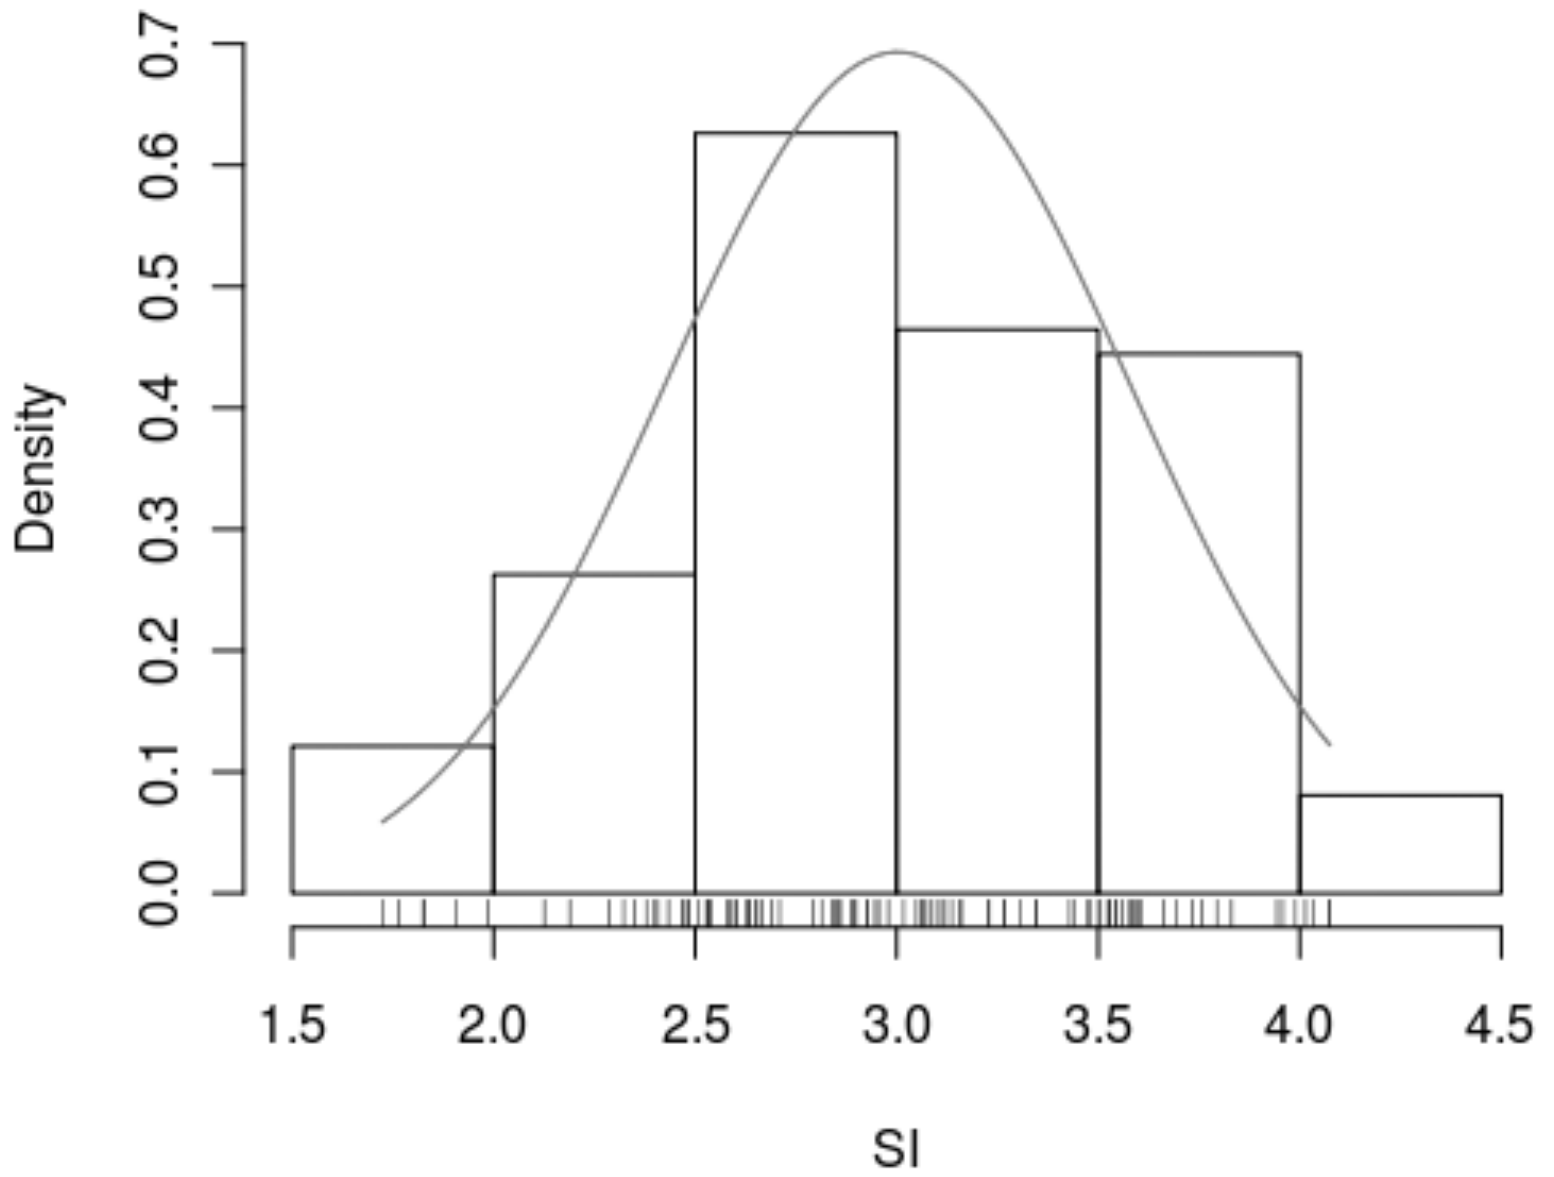

## Supplemental Figure Legends.

**Figure S1. Distribution of wild type BY4743 survival integrals.** The S.I. for individual wild type lifespans in all experiments reported was plotted, and the distribution was fit using the mean and standard deviation ( $\mu = 3.002263$ ,  $\sigma = 0.575539$ ). The Anderson-Darling test determined the distribution to be normal ( $A = 0.4855$ ,  $P = 0.2217$ ).
